# Supplementary material for: Identification of functional modules using network topology and high-throughput data
Source: Springer Nature journal article supplement (doi:10.1186/1752-0509-1-8), 2007-01-26
Supplement: 12918_2006_8_MOESM1_ESM.pdf [file 12918_2006_8_MOESM1_ESM.pdf]

# 1 Osmotic shock response in *S. cerevisiae*

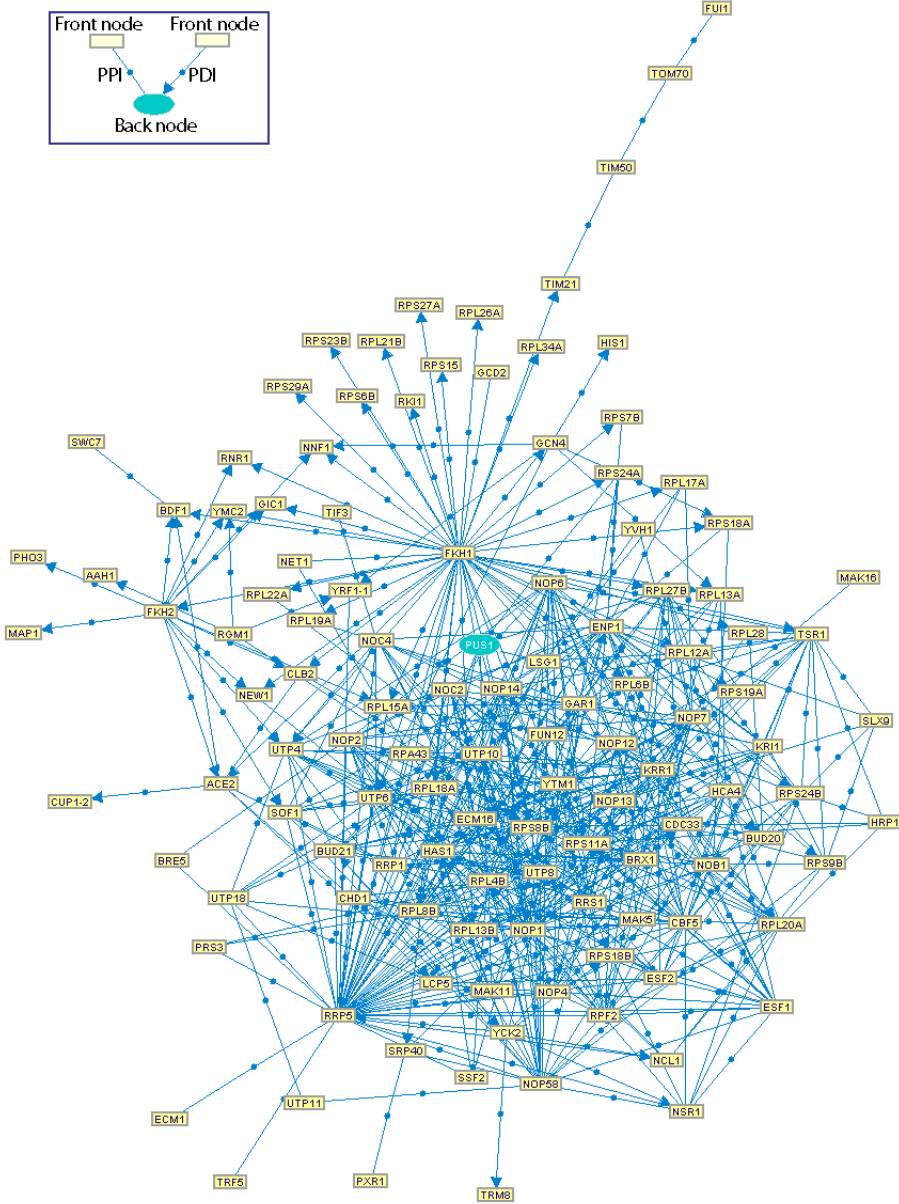

Figure 1: Osmotic shock response - JACS 1.

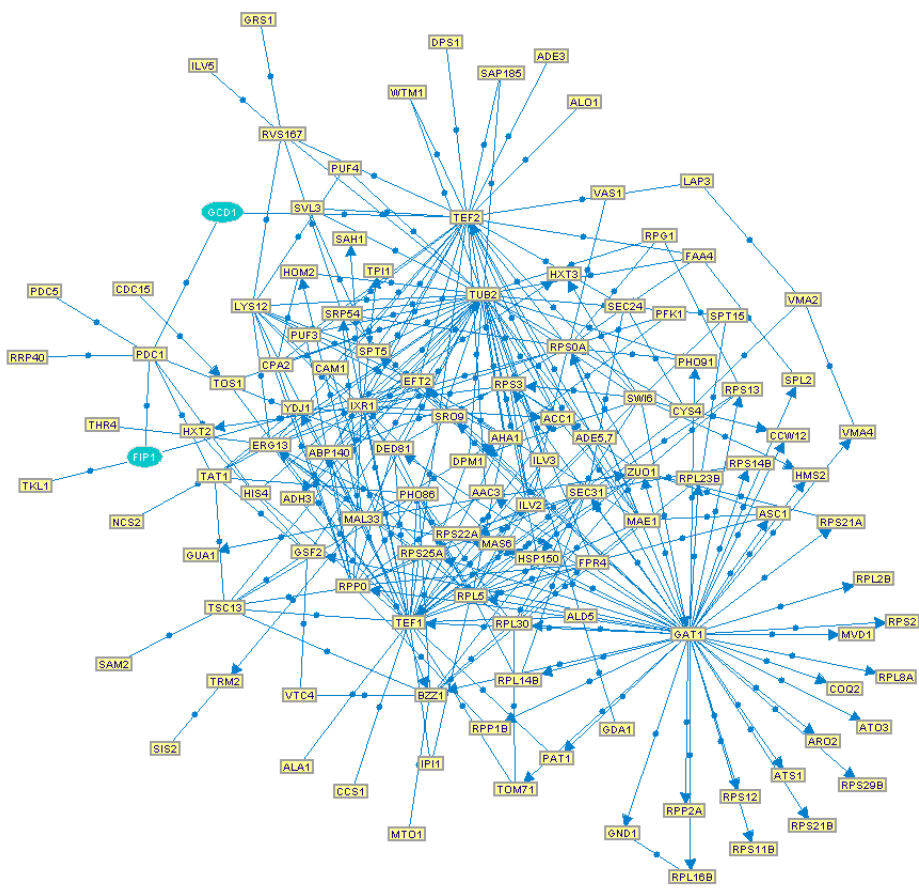

Figure 2: Osmotic shock response - JACS 2.

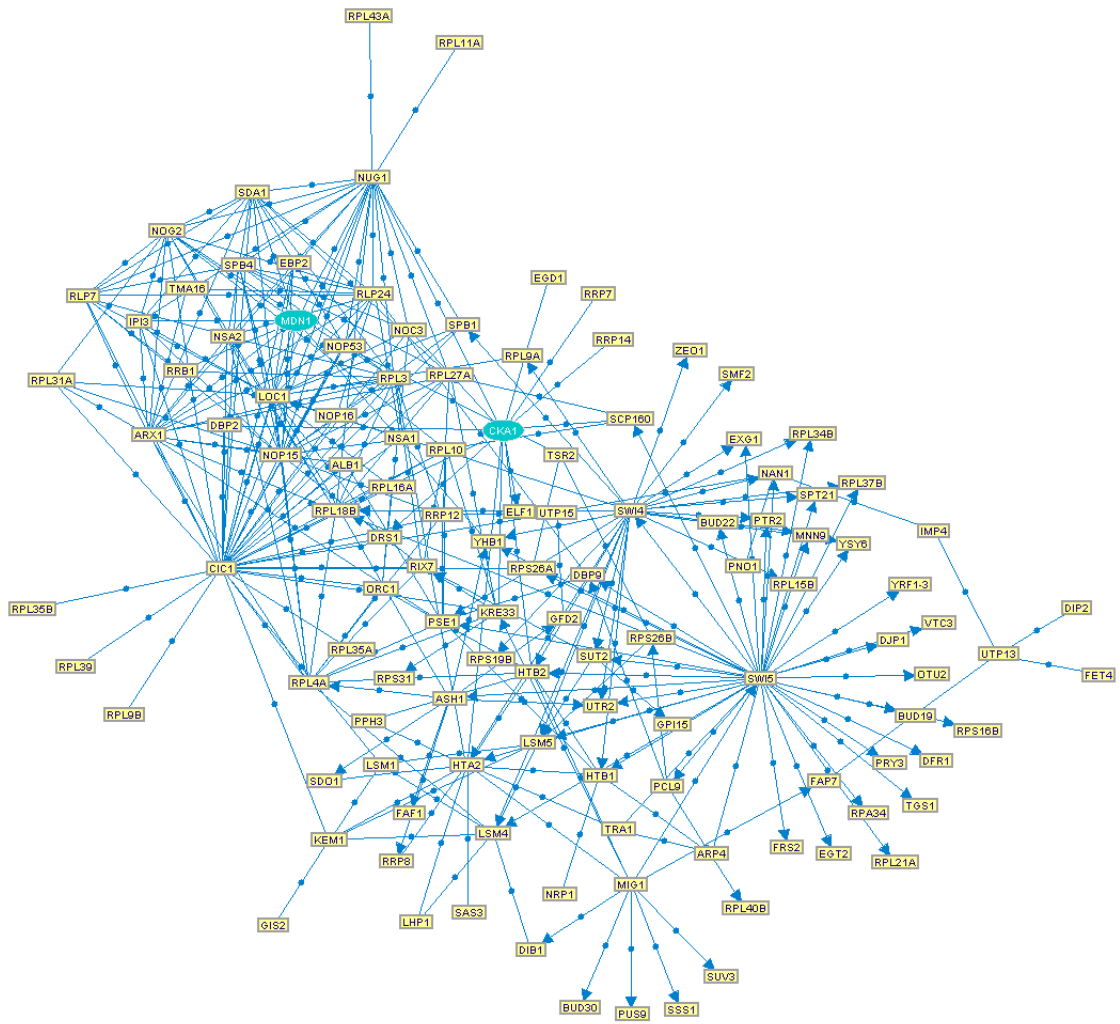

Figure 3: Osmotic shock response - JACS 3.

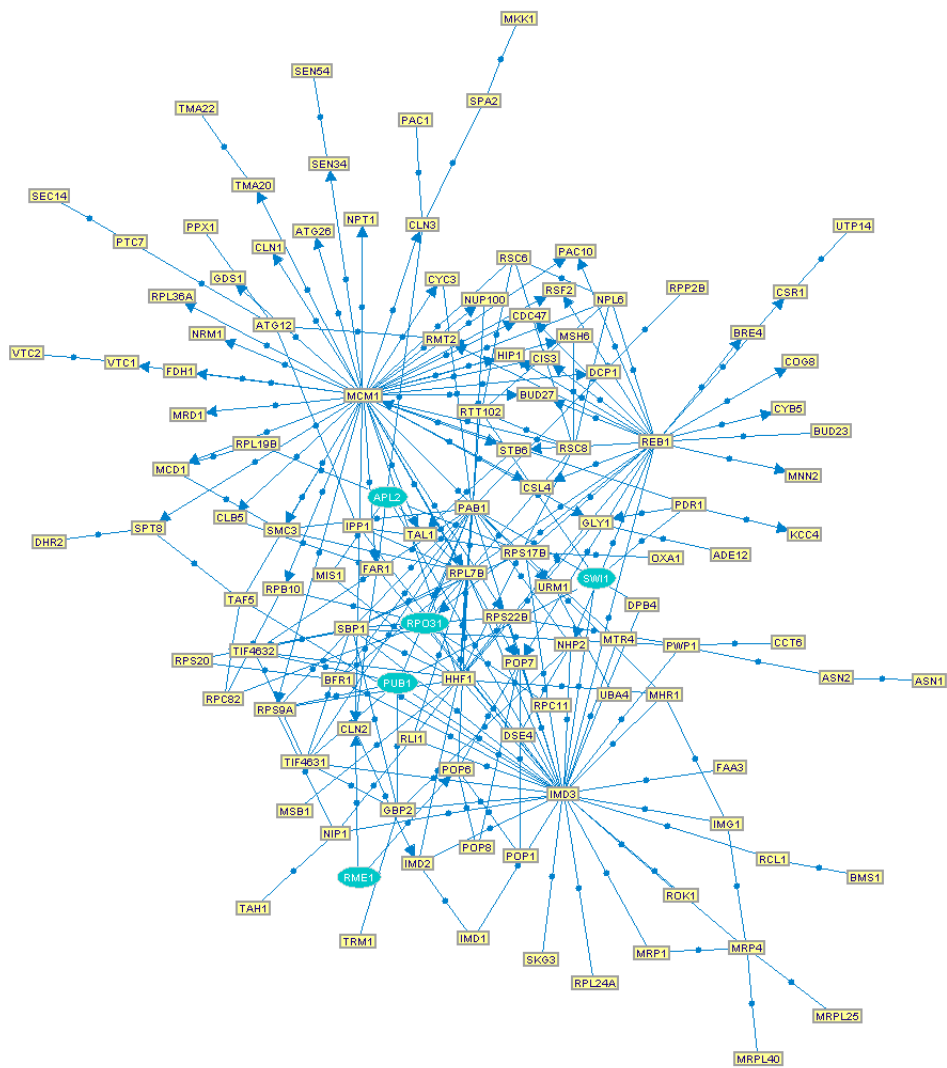

Figure 4: Osmotic shock response - JACS 4.

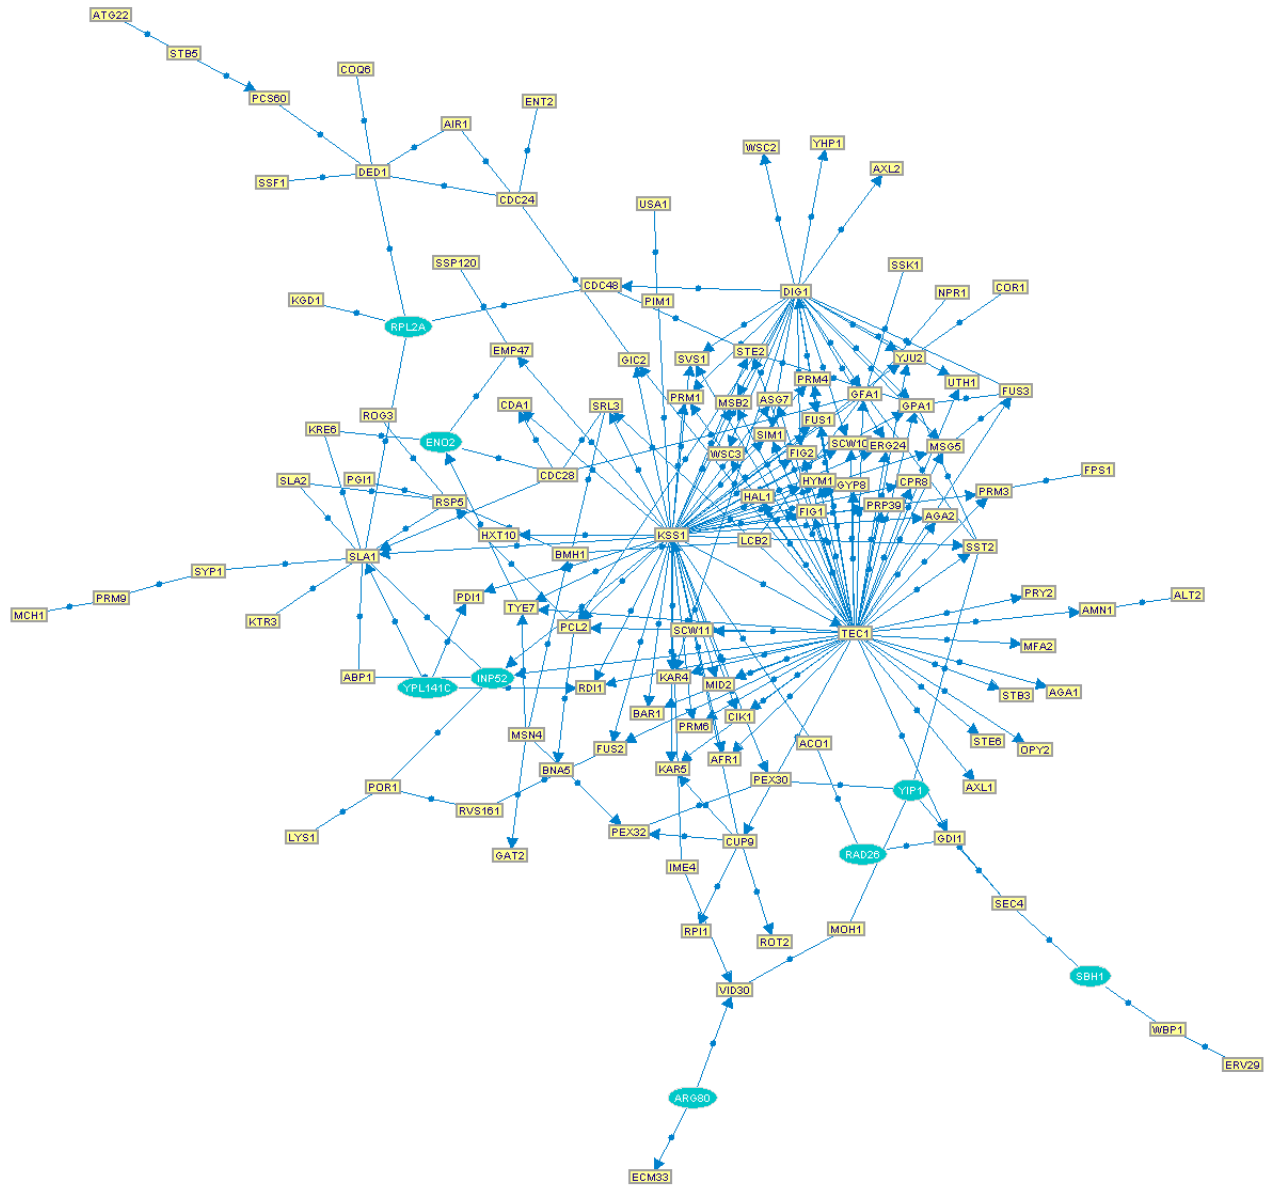

Figure 5: Osmotic shock response - JACS 5.





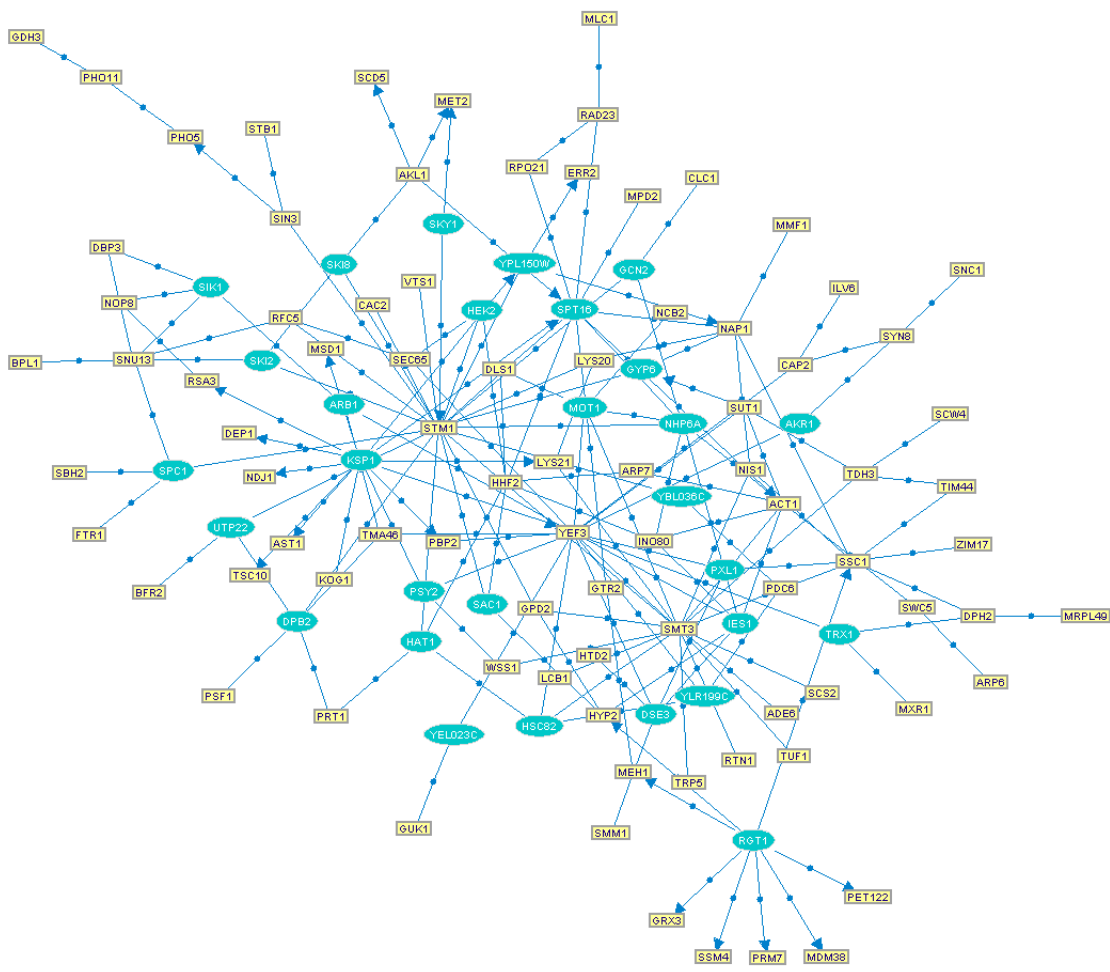

Figure 8: Osmotic shock response - JACS 8.



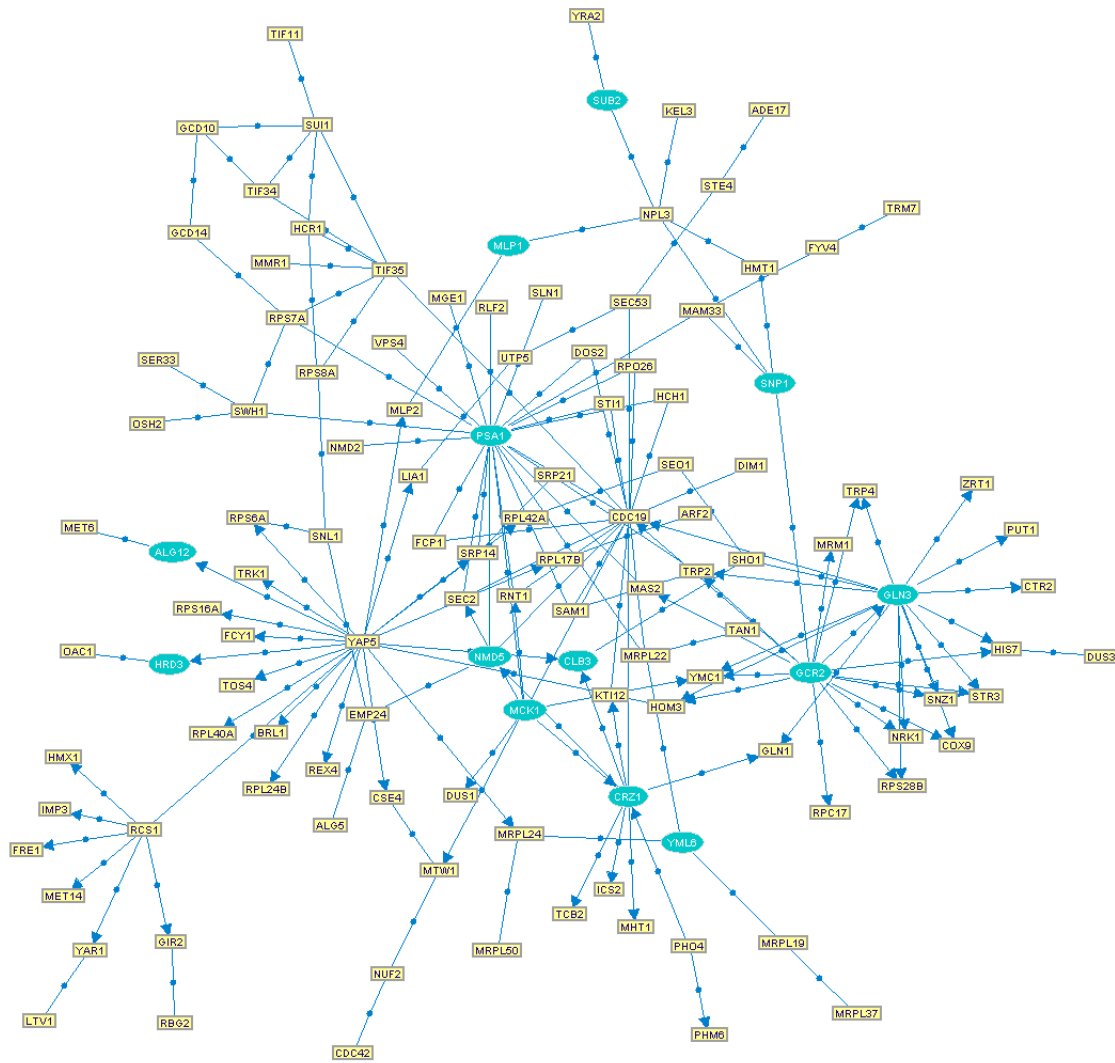

Figure 9: Osmotic shock response - JACS 9.



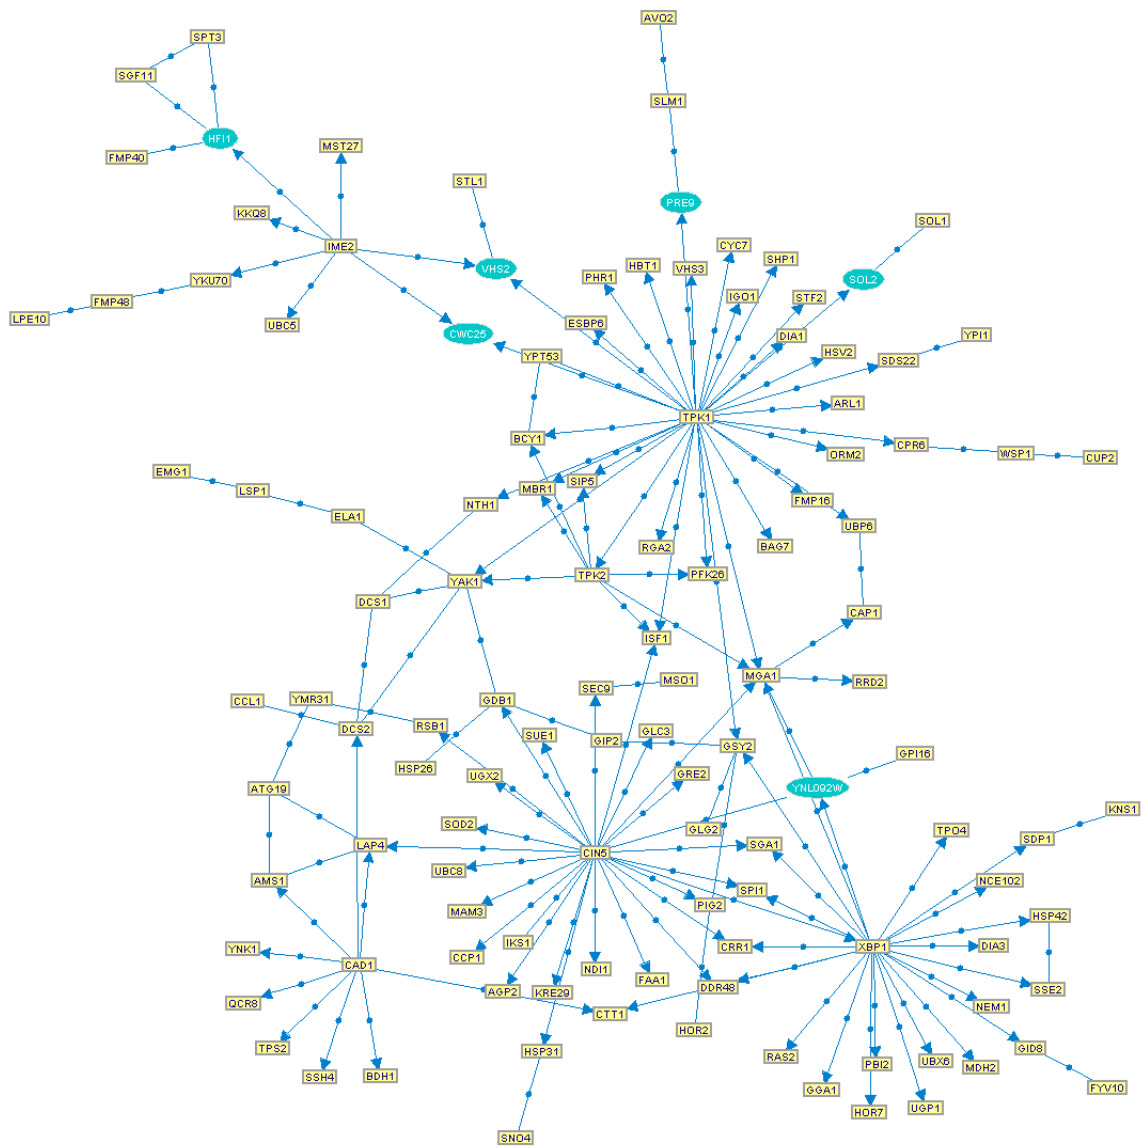

Figure 11: Osmotic shock response - JACS 11.



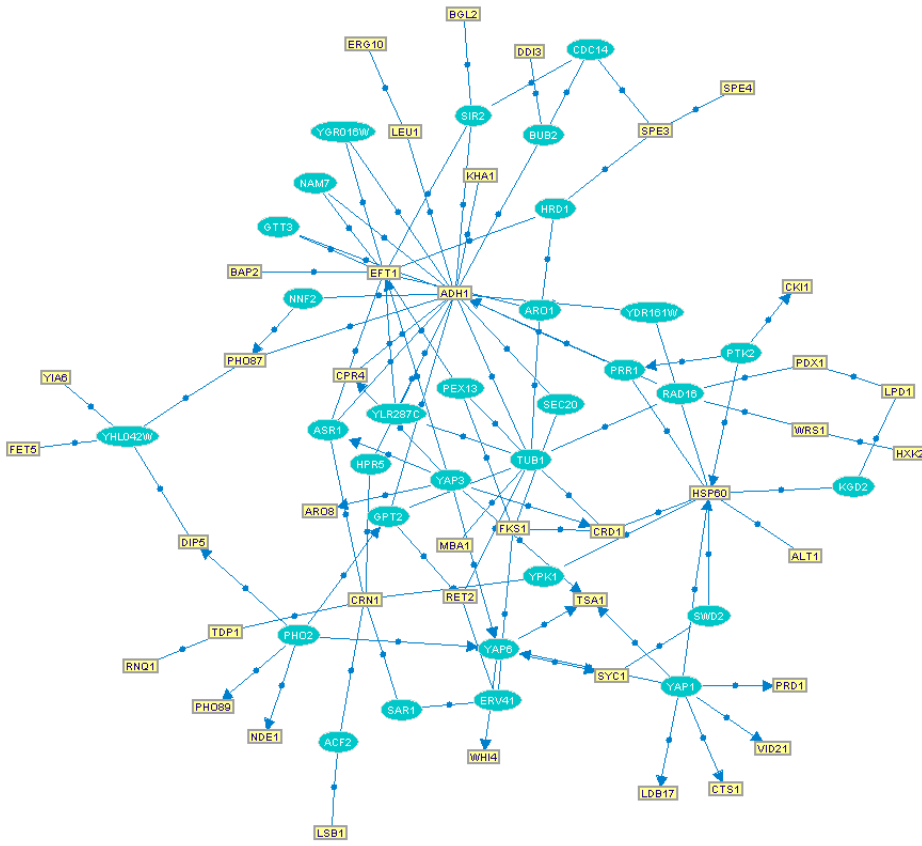

Figure 13: Osmotic shock response - JACS 13.

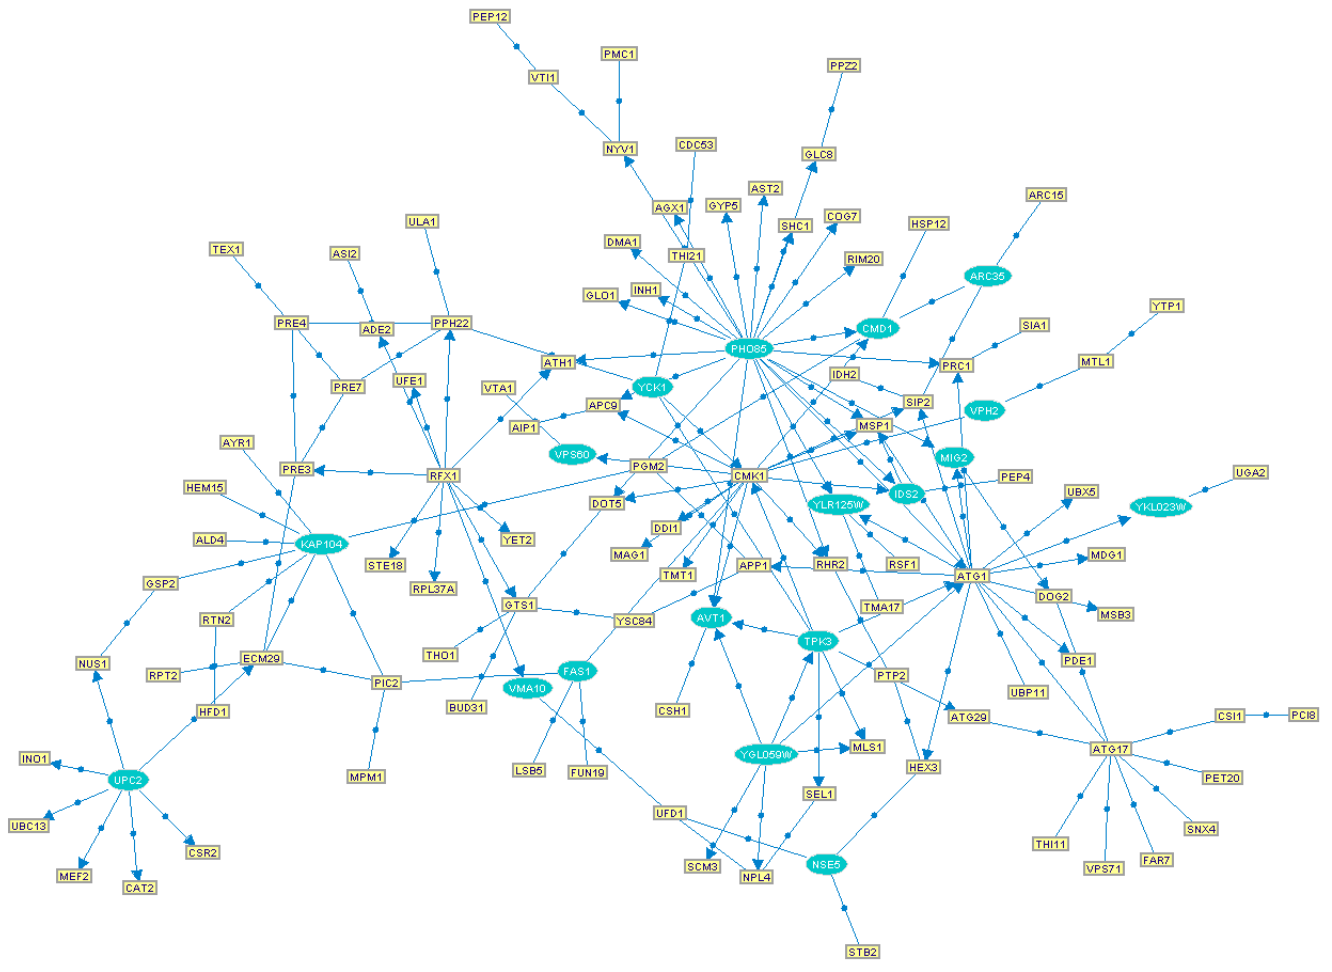

Figure 14: Osmotic shock response - JACS 14.

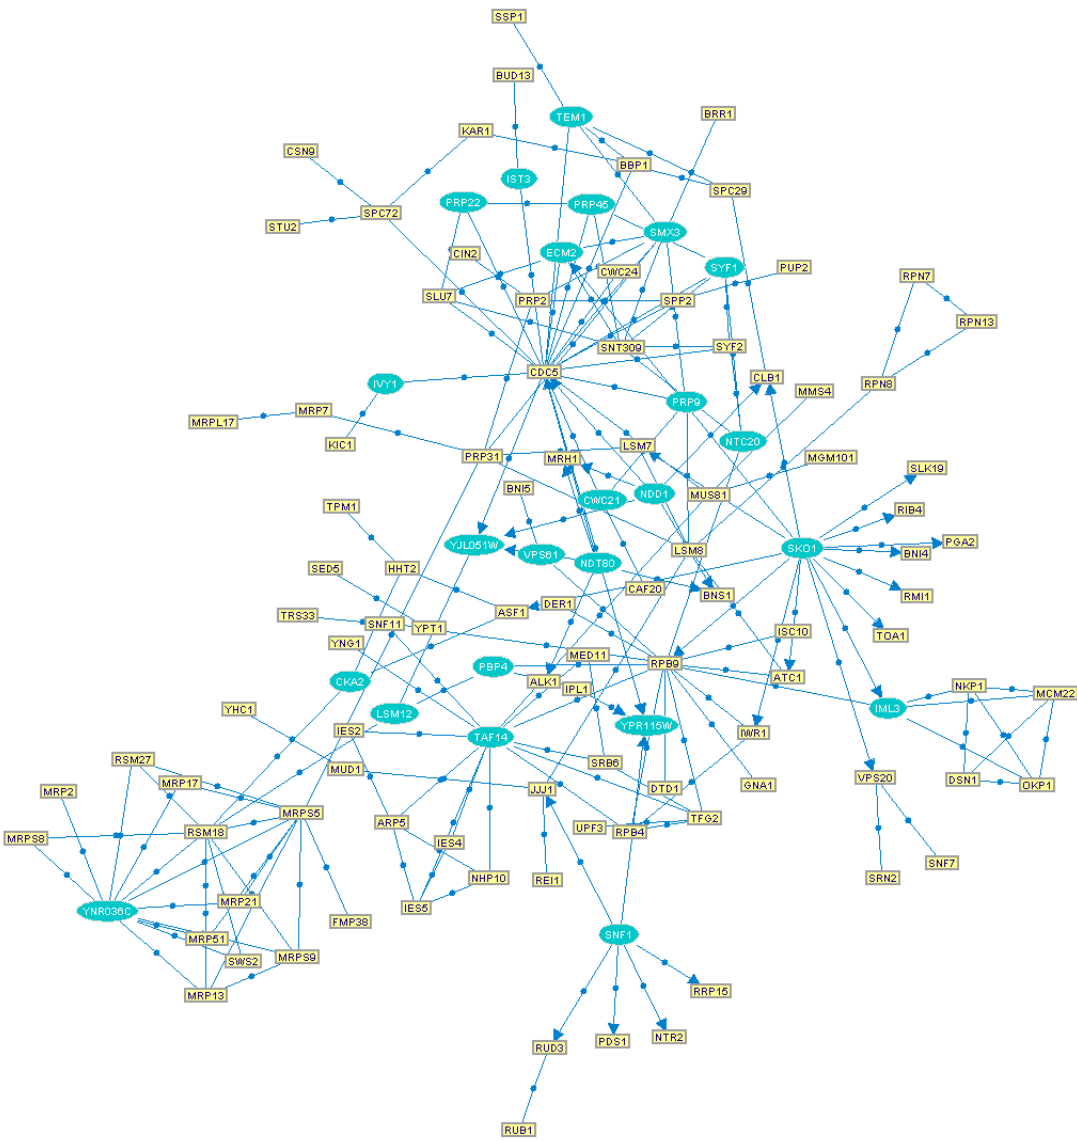

Figure 15: Osmotic shock response - JACS 15.

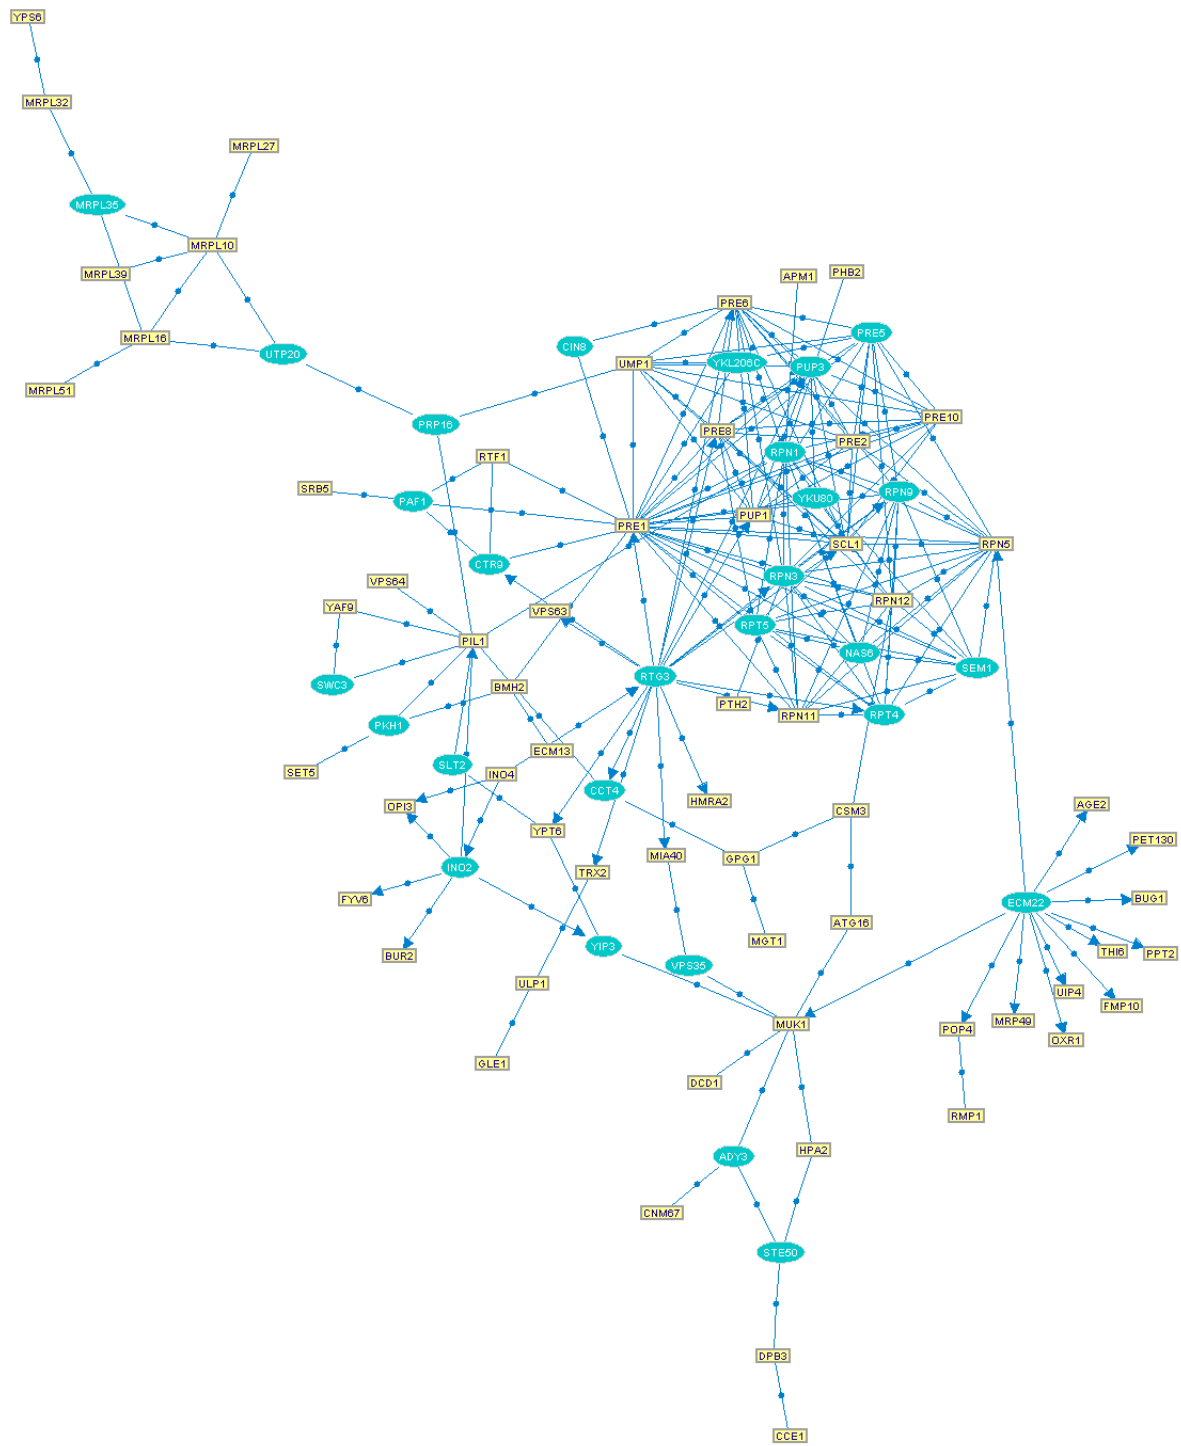

Figure 16: Osmotic shock response - JACS 16.



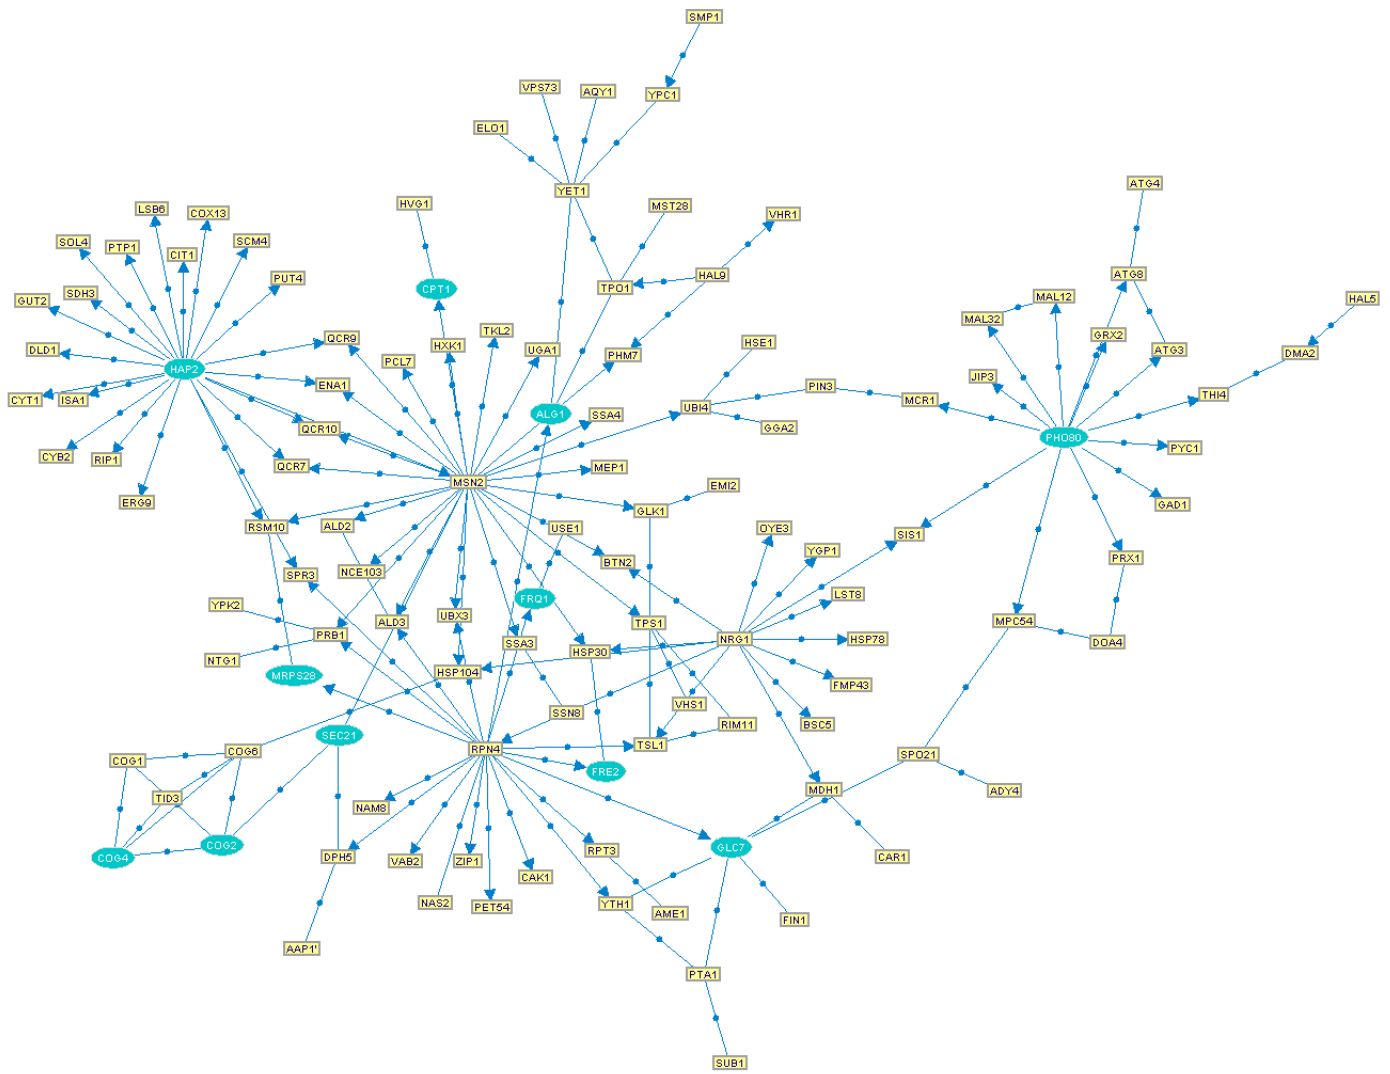

Figure 17: Osmotic shock response - JACS 17.

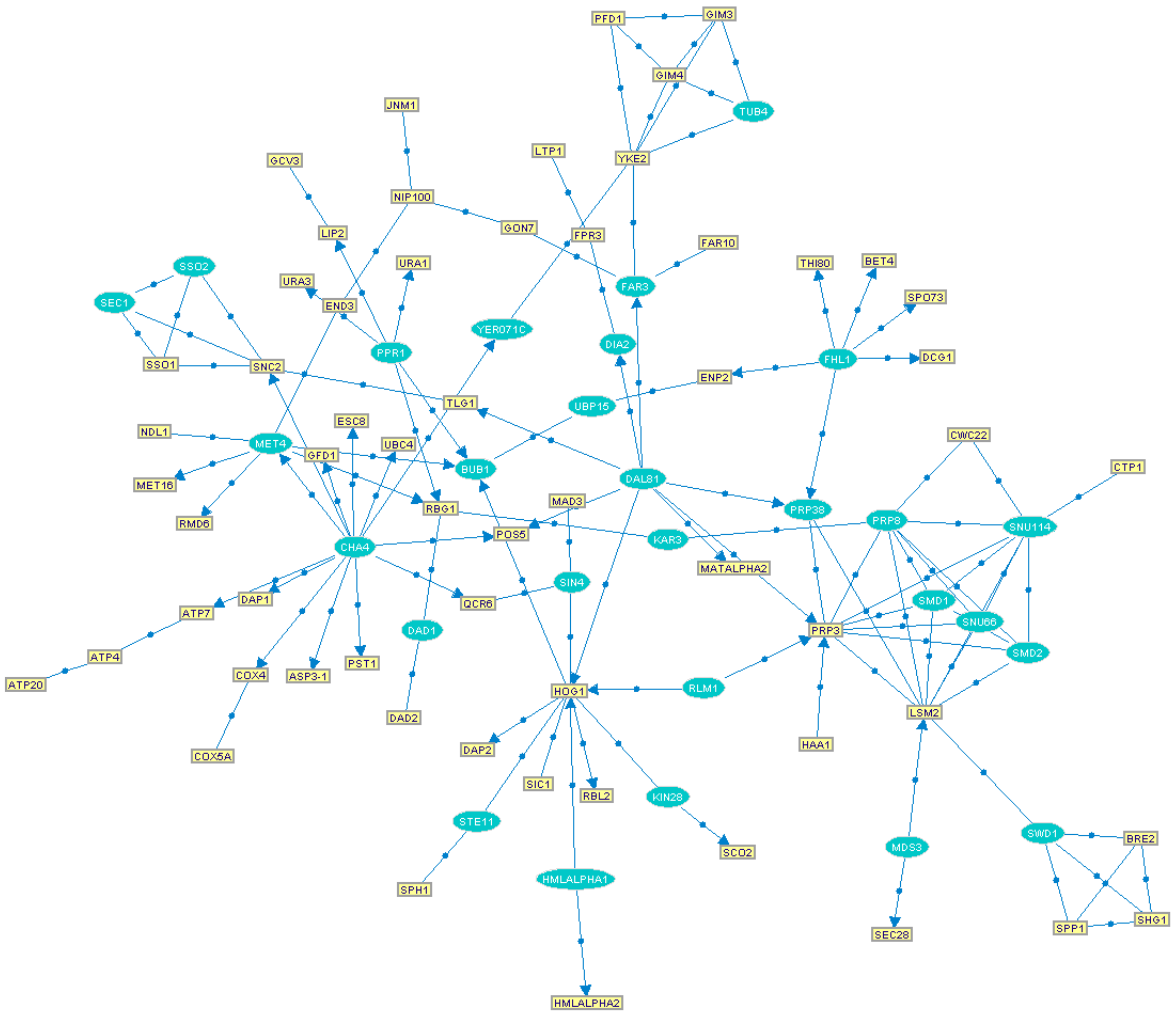

Figure 18: Osmotic shock response - JACS 18.

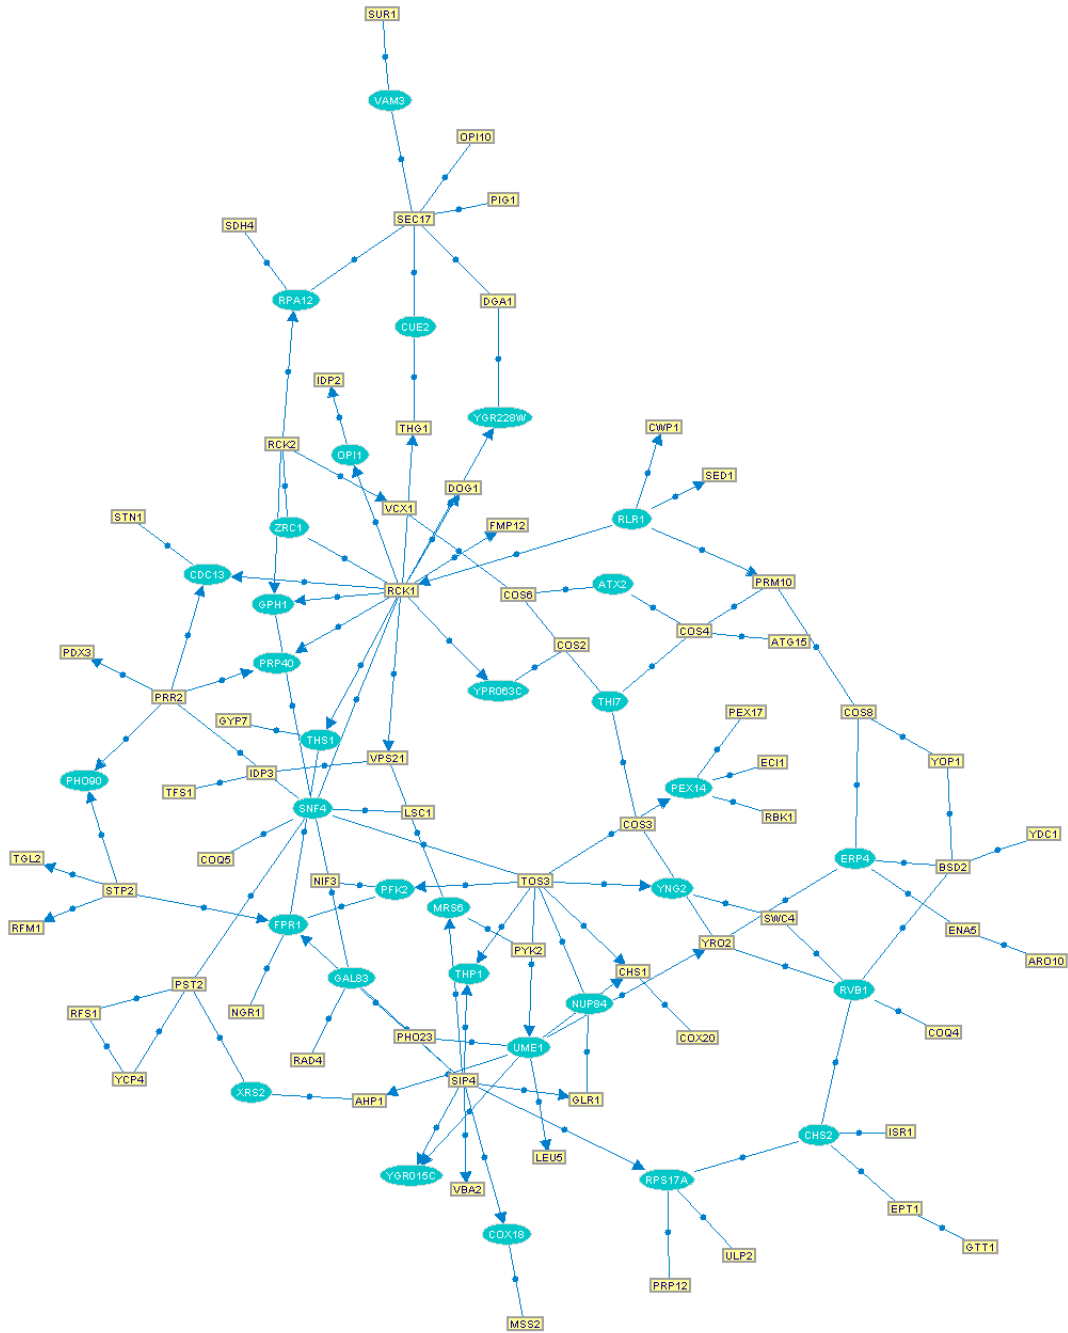

Figure 19: Osmotic shock response - JACS 19.

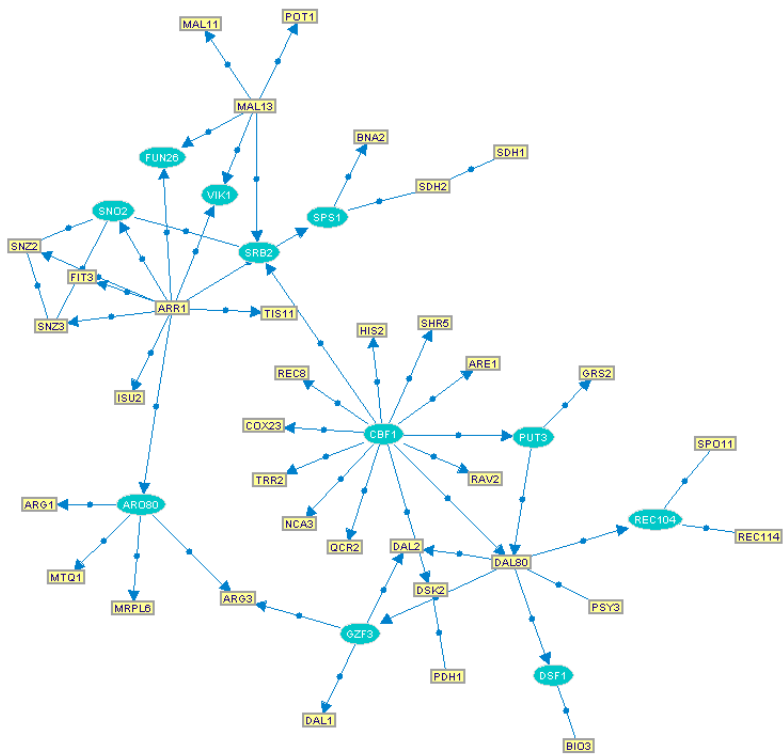

Figure 20: Osmotic shock response - JACS 20.



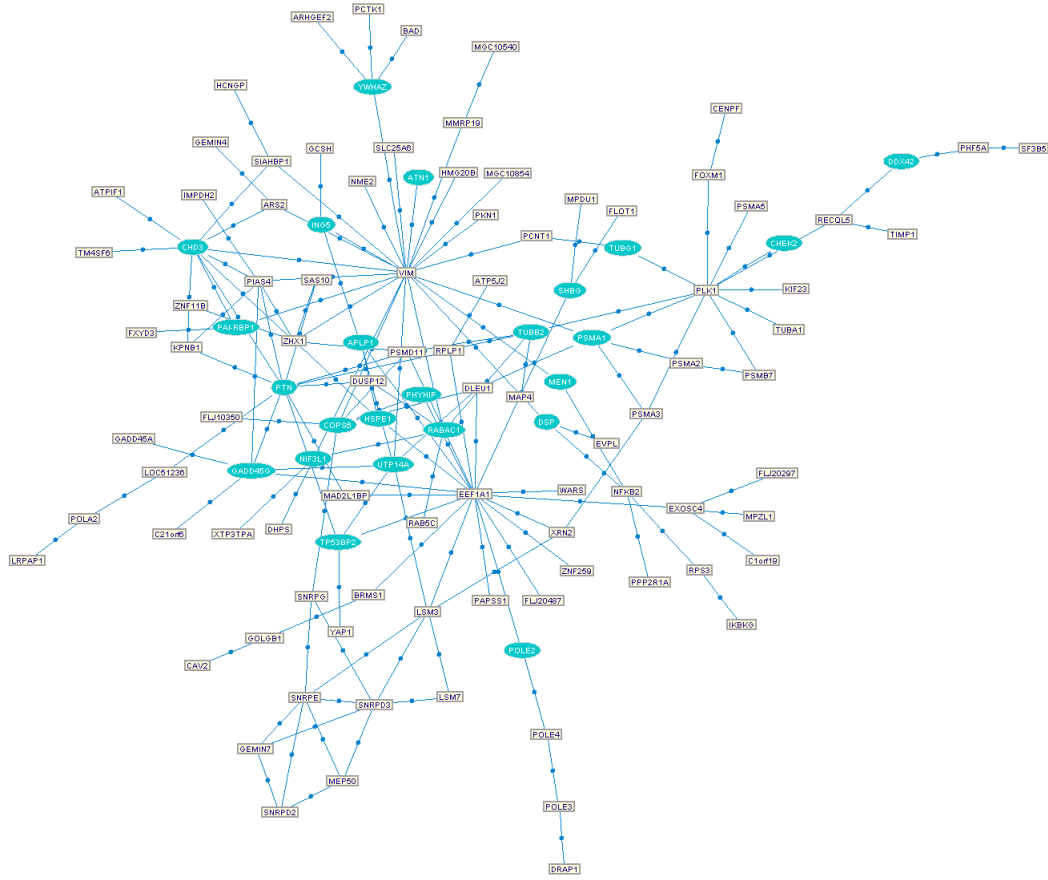

Figure 22: Human cell cycle - JACS 2.

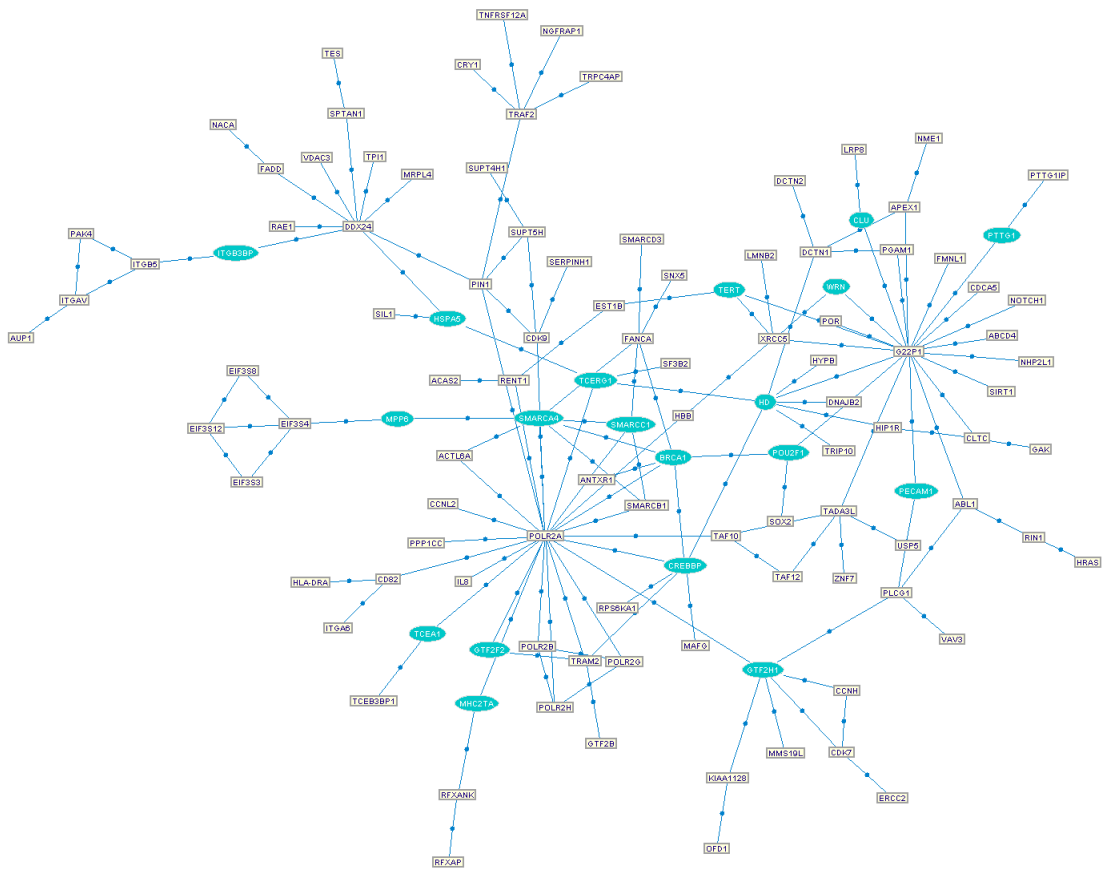

Figure 23: Human cell cycle - JACS 3.







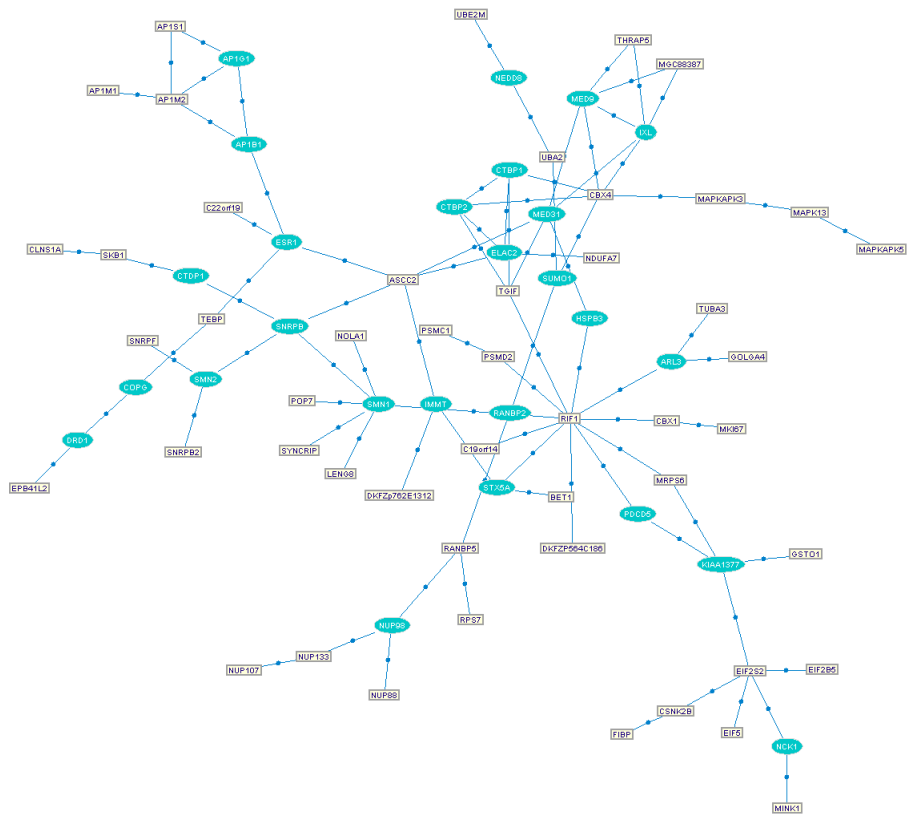

Figure 26: Human cell cycle - JACS 6.

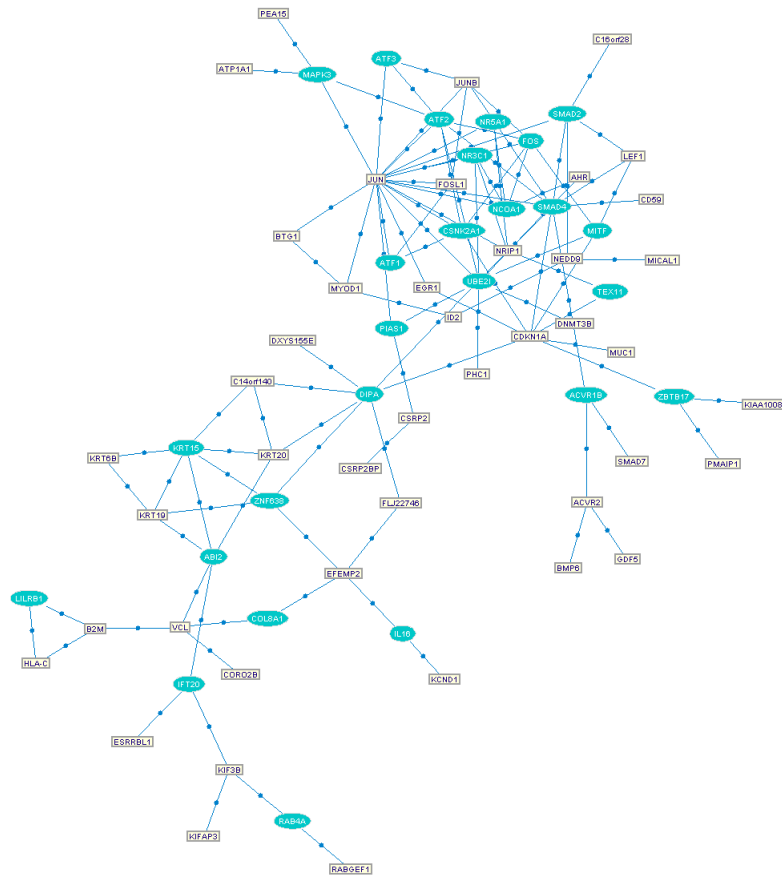

Figure 27: Human cell cycle - JACS 7.

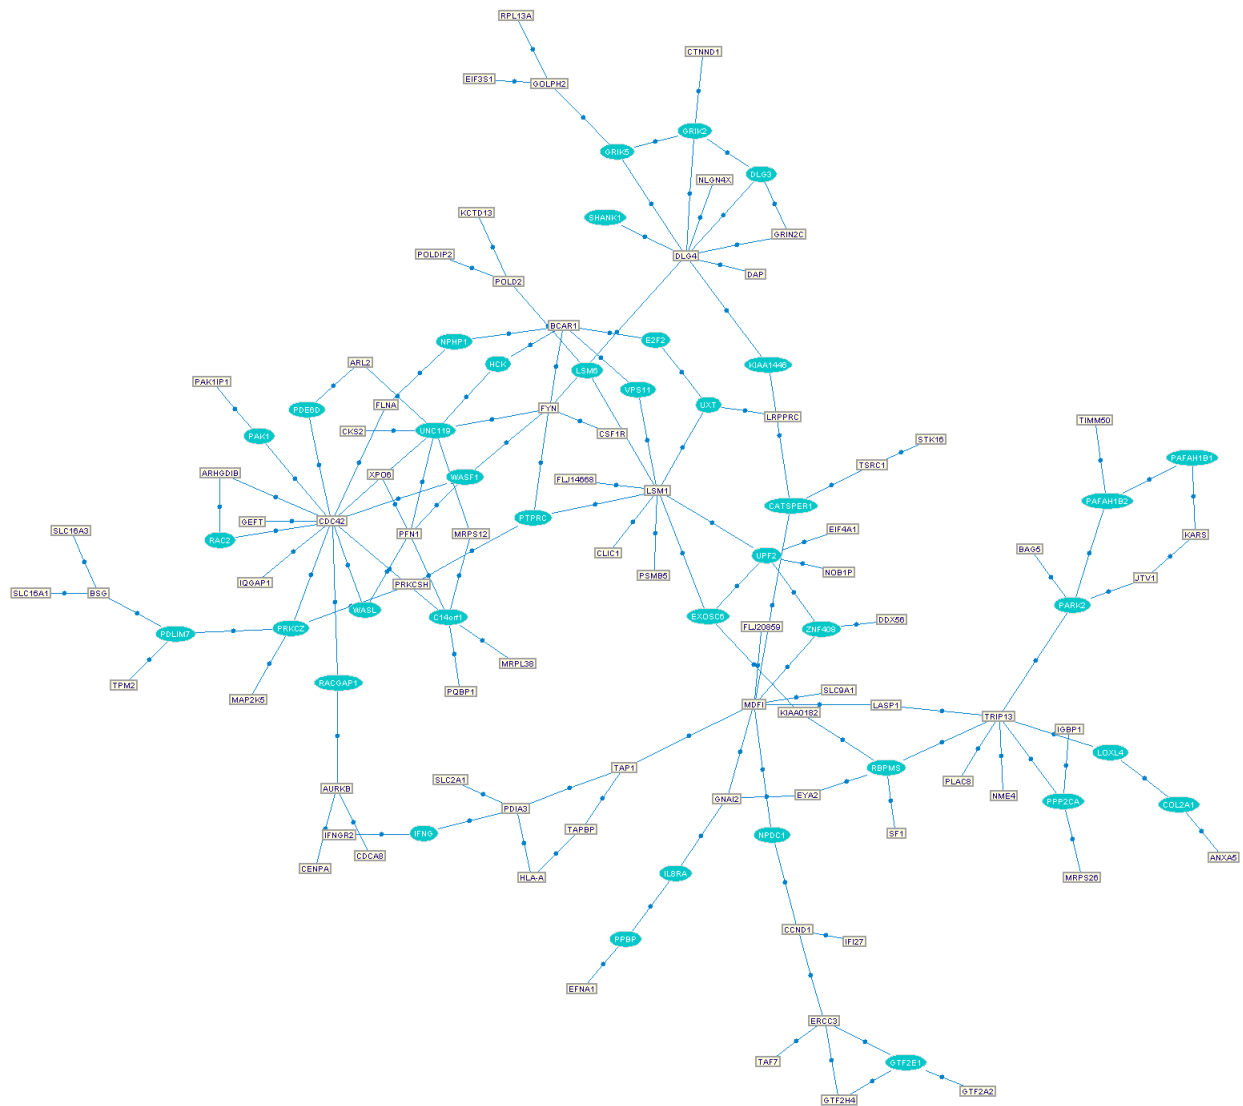

Figure 28: Human cell cycle - JACS 8.

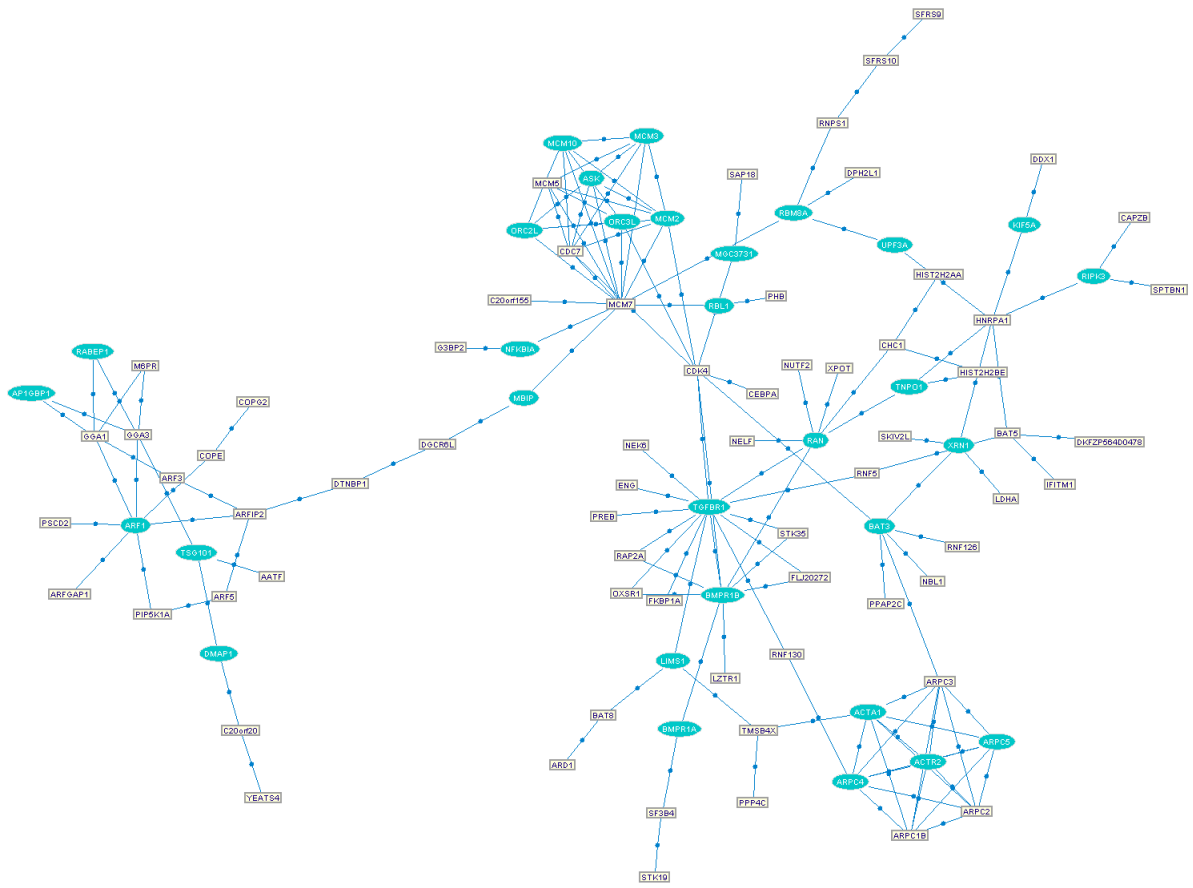

Figure 29: Human cell cycle - JACS 9.

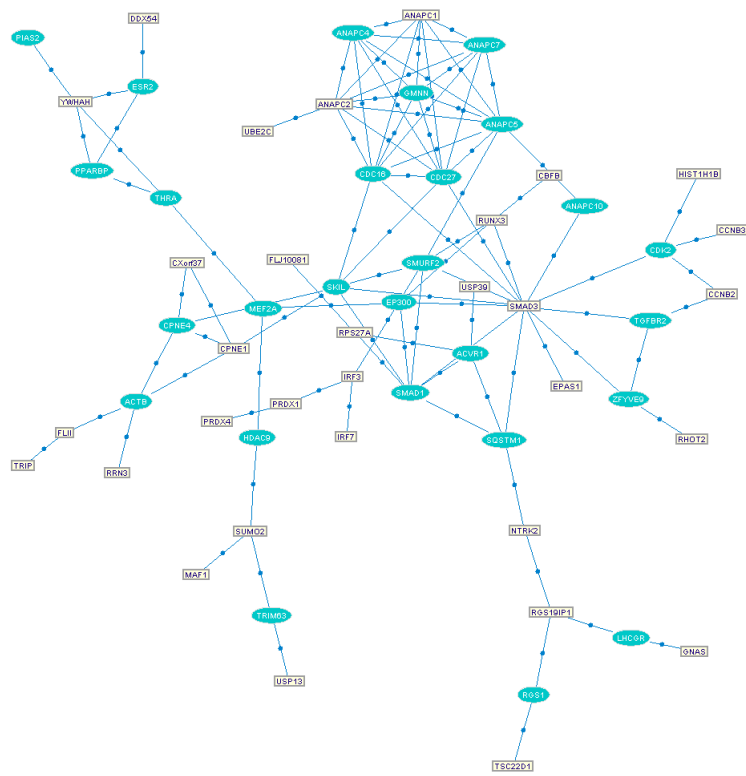

Figure 30: Human cell cycle - JACS 10.



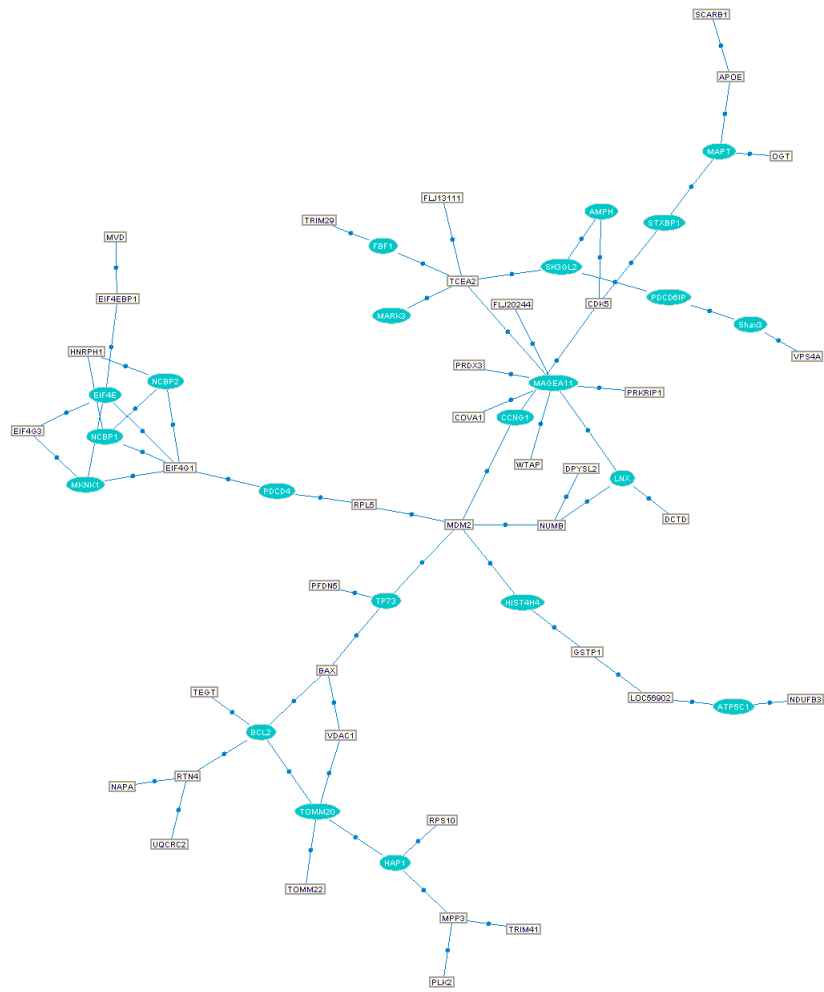

Figure 32: Human cell cycle - JACS 12.



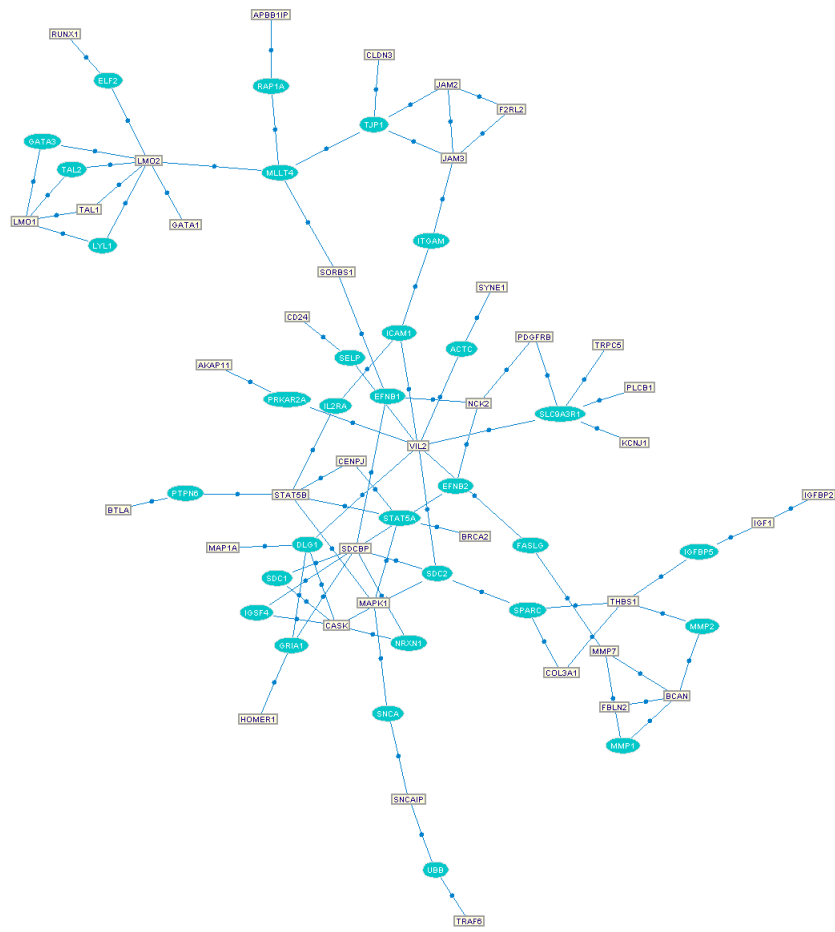

Figure 33: Human cell cycle - JACS 13.
